# Supplementary material
Source: Springer Nature journal article supplement (https://www.springermedizin.de/resource/supplementary/12885_2010_2537_MOESM4_ESM.pdf/9462450)
Supplement: MOESM4 [file 9462450]

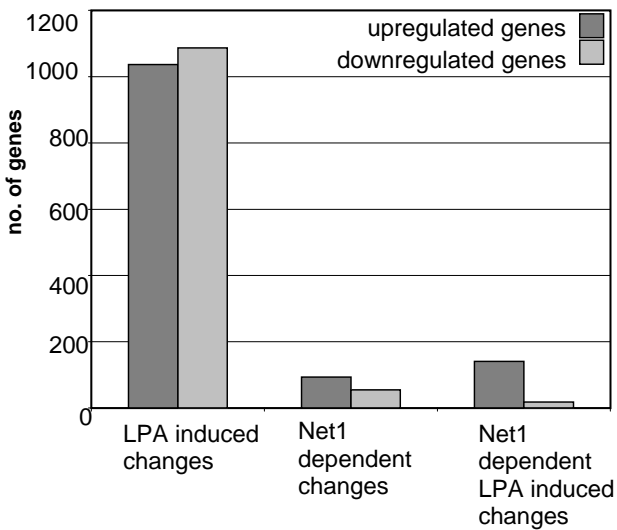

| Cell name       | NET 1     | LPA stimulation |
|-----------------|-----------|-----------------|
| Control "NT A"  | Normal +  | Stimulated +    |
| Control "NT A"  | Normal +  | Unstimulated -  |
| Control "NT B"  | Normal +  | Stimulated +    |
| Control "NT B"  | Normal +  | Unstimulated -  |
| Knockdown "63A" | Reduced - | Stimulated +    |
| Knockdown "63A" | Reduced - | Unstimulated -  |
| Knockdown "63B" | Reduced - | Stimulated +    |
| Knockdown "63B" | Reduced - | Unstimulated -  |
| Knockdown "65A" | Reduced - | Stimulated +    |
| Knockdown "65A" | Reduced - | Unstimulated -  |
| Knockdown "65B" | Reduced - | Stimulated +    |
| Knockdown "65B" | Reduced - | Unstimulated -  |

|                                          |                                                      |
|------------------------------------------|------------------------------------------------------|
| Net1 dependent gene expression           | (63A+B)+ (65A+B) without LPA vs (NT A+B) without LPA |
| LPA driven gene expression               | NTA+NTB without LPA vs NTA+N with LPA                |
| LPA driven Net 1 dependent transcription | (63A+B)+ (65A+B) with LPA vs (NT A+B) with LPA       |
